# Supplementary material
Source: PubMed Central journal article supplement (PMC5321627)
Supplement: NIHMS844298-supplement-Suppl.pdf [file NIHMS844298-supplement-Suppl.pdf]

## Supplemental Figures

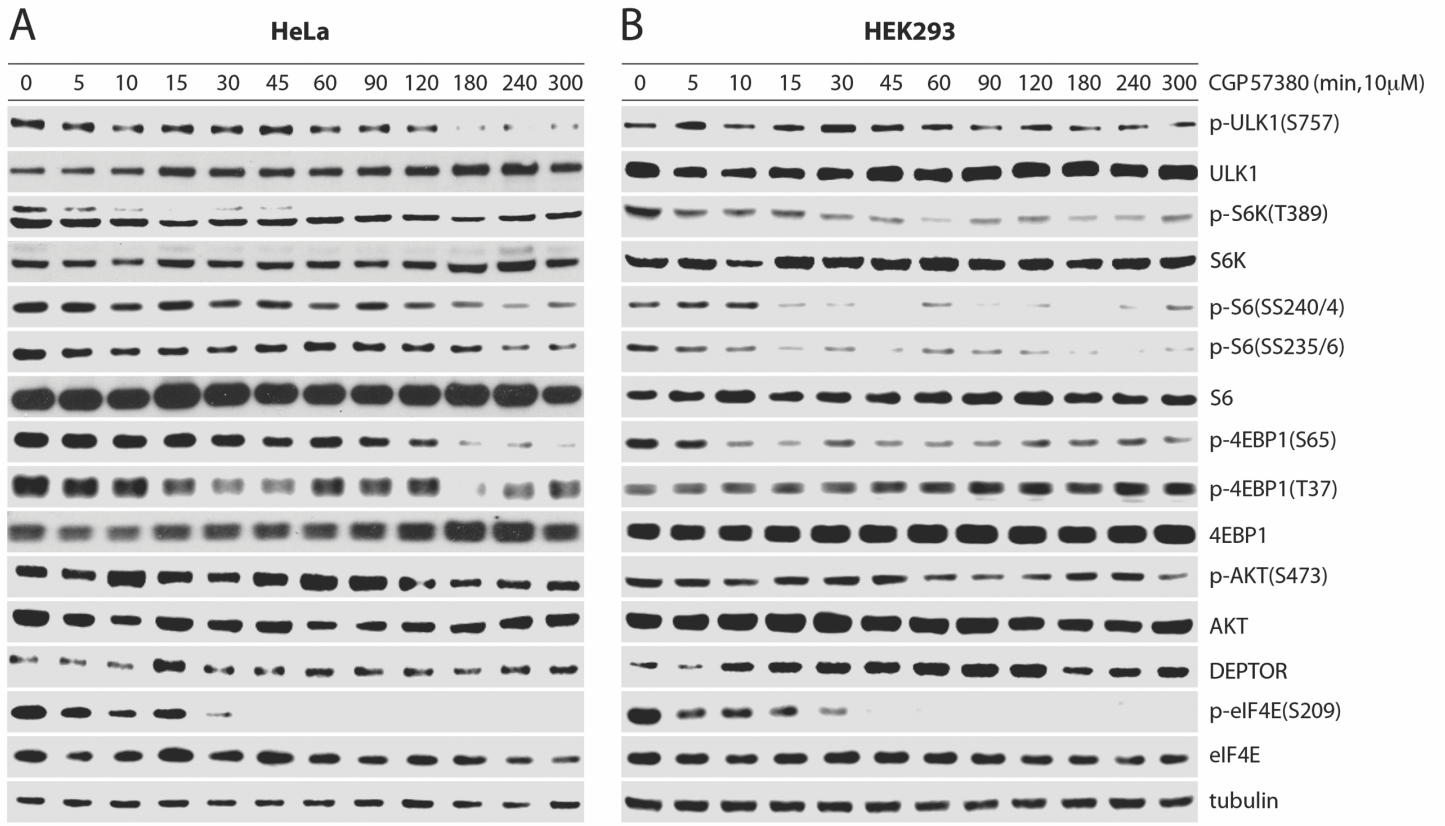

**Figure S1, related to Fig 2.** Kinetics of mTORC1 and AKT signaling in HeLa (A) and HEK293 cells (B) treated with CGP57380 as shown. The signal intensities were quantified and the signaling kinetics are depicted in Figure 2 (D, E).

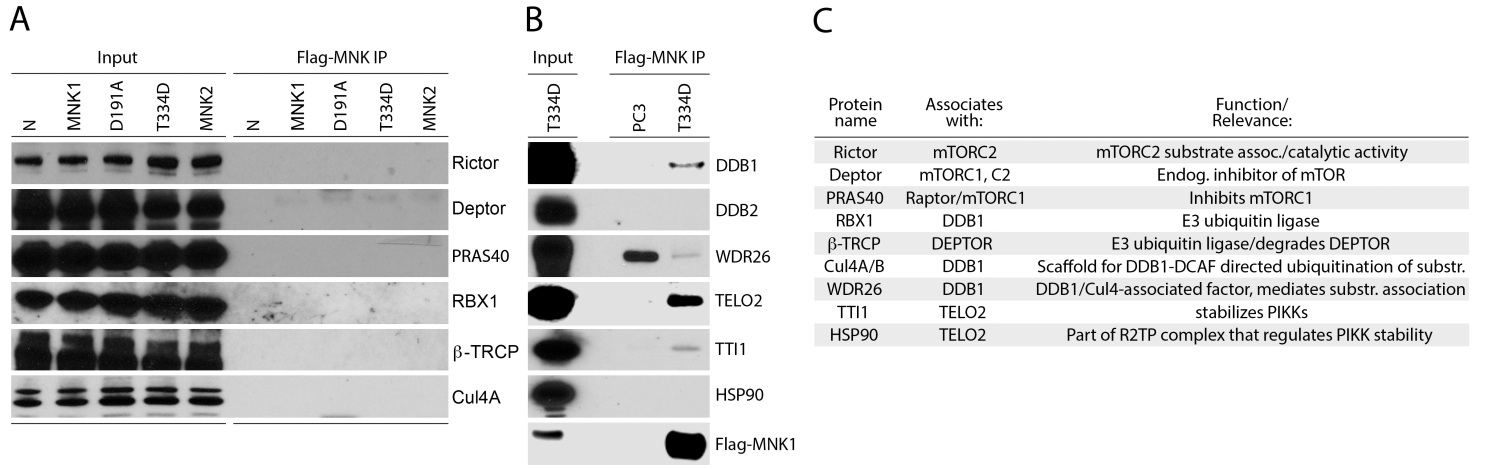

**Figure S2, related to Figure 4.** In-depth analysis of mTORC1-relevant MNK interactions by Flag-MNK co-IP. IP analyses as shown in Figure 4B were extended to include additional proteins with potential binding with a MNK-anchored protein aggregate including mTORC1/2 components. The tests included IPs with Flag-MNK variants specified in Figure 4 (A) and with the constitutively active Flag-MNK1(T344D) (B). (C) Introduction to the relevance of proteins interrogated in (A, B).

**A**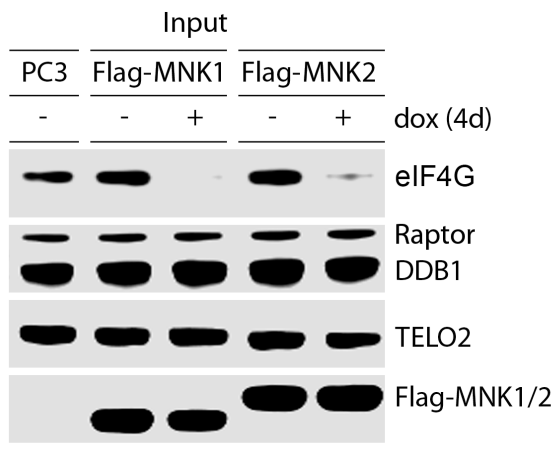**B**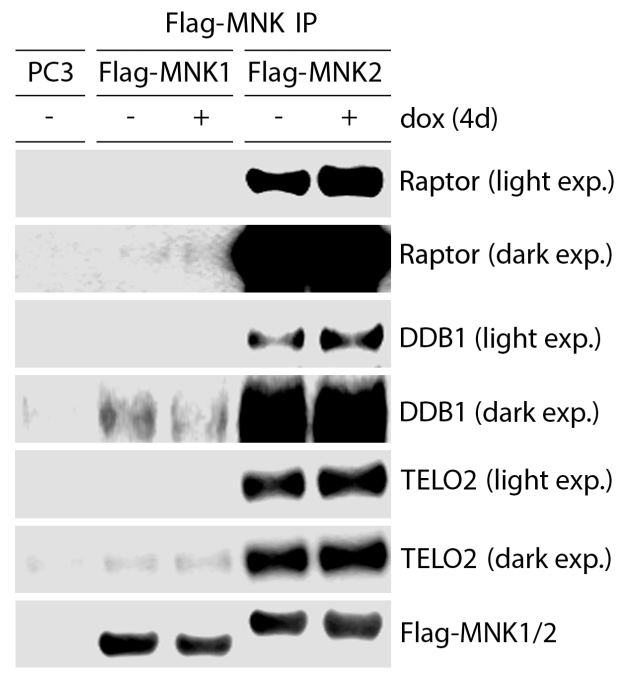

**Figure S3, related to Figure 4.** MNK interacts with mTOR, TELO2 and DDB1 regardless of the presence of eIF4G1. HEK293 cells with dox-inducible eIF4G1 shRNA expression were mock (-) or dox (+) treated for 4 days and transfected with Flag-MNK1 or -MNK2 (48h) as indicated. Cell lysates were subjected to IP and immunoblot as shown.
